# Supplementary material
Source: Copernicus journal article supplement (doi:10.5194/egusphere-2026-3584)
Supplement: Supplementary file 1 [file egusphere-2026-3584-supplement.pdf]

1 Supplement

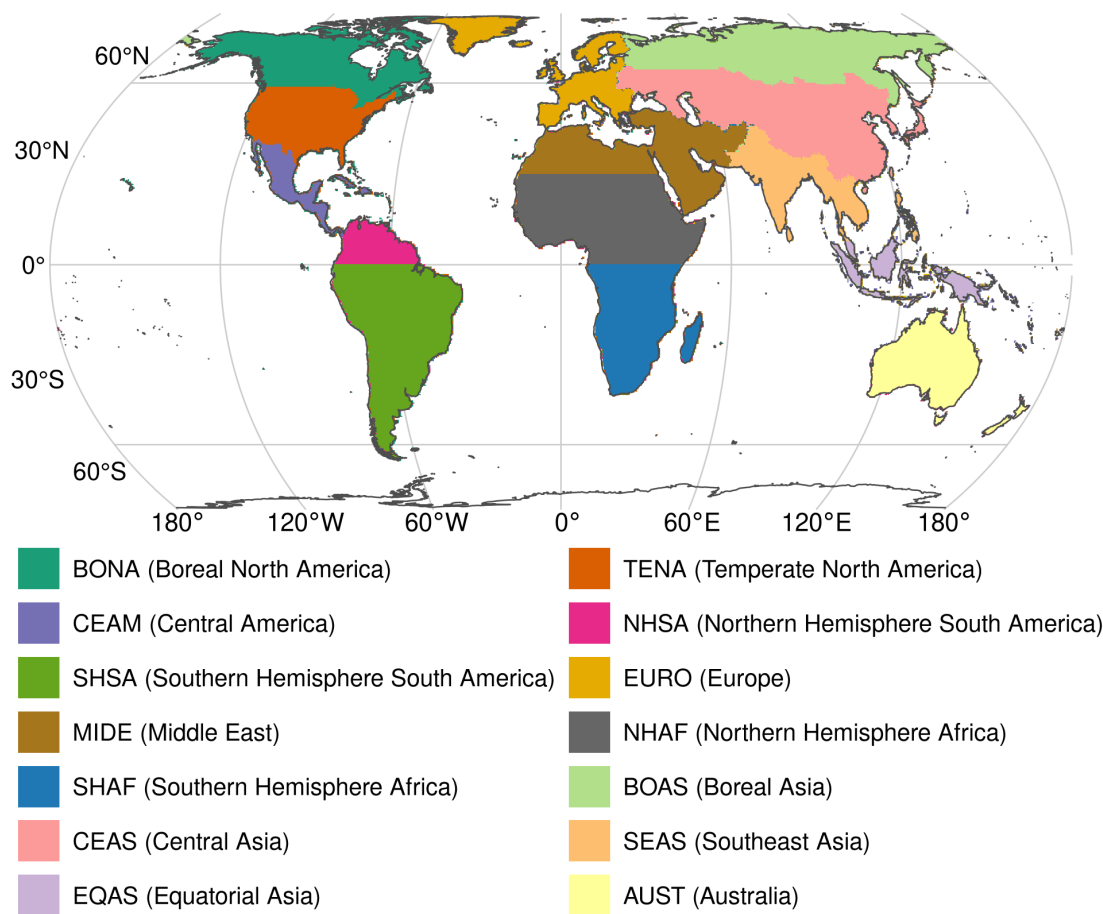

**Figure S1.** GFED regions used in our analysis following ?, re-gridded to 0.5° resolution.

| Region | GFED4.1s <sub>nat</sub> | GFED5 <sub>nat</sub> | Prognostic BA | Diagnostic BA | Prog. – Diag. |
|--------|-------------------------|----------------------|---------------|---------------|---------------|
| GLOBAL | 1.58                    | 2.81                 | 2.34 ± 1.75   | 1.84 ± 0.71   | 0.50          |
| NHAF   | 0.38                    | 0.66                 | 0.41 ± 0.37   | 0.35 ± 0.17   | 0.06          |
| SHAF   | 0.62                    | 0.92                 | 0.48 ± 0.43   | 0.65 ± 0.24   | -0.17         |
| SHSA   | 0.14                    | 0.22                 | 0.37 ± 0.35   | 0.31 ± 0.22   | 0.06          |
| SEAS   | 0.07                    | 0.28                 | 0.28 ± 0.28   | 0.10 ± 0.06   | 0.18          |
| AUST   | 0.10                    | 0.17                 | 0.14 ± 0.11   | 0.11 ± 0.05   | 0.03          |
| BOAS   | 0.10                    | 0.28                 | 0.07 ± 0.09   | 0.09 ± 0.04   | -0.02         |
| CEAS   | 0.03                    | 0.05                 | 0.14 ± 0.09   | 0.04 ± 0.02   | 0.10          |
| CEAM   | 0.01                    | 0.07                 | 0.08 ± 0.08   | 0.04 ± 0.03   | 0.04          |
| NHSA   | 0.02                    | 0.03                 | 0.04 ± 0.04   | 0.06 ± 0.04   | -0.02         |
| TENA   | 0.02                    | 0.02                 | 0.09 ± 0.07   | 0.03 ± 0.02   | 0.06          |
| MIDE   | 0.00                    | 0.00                 | 0.05 ± 0.05   | 0.01 ± 0.01   | 0.04          |
| EQAS   | 0.01                    | 0.02                 | 0.02 ± 0.02   | 0.02 ± 0.02   | 0.00          |
| BONA   | 0.06                    | 0.08                 | 0.06 ± 0.07   | 0.03 ± 0.02   | 0.03          |
| EURO   | 0.00                    | 0.01                 | 0.07 ± 0.06   | 0.01 ± 0.01   | 0.06          |

**Table S1.** Mean fire emissions across the shared GFED period (2002–2016) in the GFED4.1s and GFED5 products (with land-use associated fires removed) and multi-model averages in the prognostic and diagnostic BA simulations, with inter-model spread (S.D) shown. The final column shows the difference in the multi-model mean (Prognostic BA minus Diagnostic BA).

| Region | GFED4.1s <sub>nat</sub> | GFED5 <sub>nat</sub> | Prognostic BA | Diagnostic BA |
|--------|-------------------------|----------------------|---------------|---------------|
| GLOBAL | 0.39                    | 0.42                 | 0.37 ± 0.16   | 0.44 ± 0.17   |
| NHAF   | 0.28                    | 0.30                 | 0.27 ± 0.17   | 0.27 ± 0.14   |
| SHAF   | 0.37                    | 0.39                 | 0.44 ± 0.17   | 0.40 ± 0.15   |
| SHSA   | 0.64                    | 0.50                 | 0.60 ± 0.16   | 1.06 ± 0.75   |
| SEAS   | 0.62                    | 0.66                 | 0.47 ± 0.15   | 1.00 ± 0.62   |
| AUST   | 0.23                    | 0.34                 | 0.33 ± 0.14   | 0.26 ± 0.13   |
| BOAS   | 1.30                    | 1.12                 | 0.65 ± 0.37   | 0.73 ± 0.36   |
| CEAS   | 0.30                    | 0.23                 | 0.62 ± 0.30   | 0.38 ± 0.19   |
| CEAM   | 0.67                    | 0.69                 | 0.42 ± 0.13   | 1.76 ± 1.30   |
| NHSA   | 0.44                    | 0.30                 | 0.64 ± 0.28   | 1.10 ± 0.81   |
| TENA   | 1.00                    | 0.62                 | 0.42 ± 0.21   | 1.08 ± 0.79   |
| MIDE   | 1.33                    | 0.35                 | 0.21 ± 0.14   | 0.34 ± 0.38   |
| EQAS   | 1.46                    | 0.78                 | 1.68 ± 1.75   | 3.66 ± 3.31   |
| BONA   | 2.86                    | 2.86                 | 0.59 ± 0.33   | 1.33 ± 0.89   |
| EURO   | 0.79                    | 0.61                 | 0.66 ± 0.22   | 1.54 ± 1.25   |

**Table S2.** Mean fire combustion rates across shared GFED period (2002–2016) in the GFED4.1s and GFED5 products (with land-use associated fires removed) and multi-model averages in the prognostic and diagnostic BA simulations, with inter-model spread (S.D) also shown.

| Region | Benchmark               |                      | DGVM Name |        |          |          |       |
|--------|-------------------------|----------------------|-----------|--------|----------|----------|-------|
|        | GFED4.1s <sub>nat</sub> | GFED5 <sub>nat</sub> | JULES     | EDv3   | VISIT-UT | ORCHIDEE | OCN   |
| GLOBAL | 0.66*                   | –                    | 0.16      | -0.34  | 0.52     | 0.20     | 0.16  |
|        | –                       | 1.20*                | 0.21      | -0.07  | 0.62*    | 0.36     | 0.31  |
| NHAF   | 0.73*                   | –                    | 0.29      | -0.14  | 0.16     | 0.55*    | 0.62* |
|        | –                       | 1.01*                | 0.69      | 0.62   | 0.67     | 1.08*    | 1.55* |
| SHAF   | 0.30                    | –                    | -0.01     | 0.11   | 0.14     | -0.10    | -0.05 |
|        | –                       | 0.26                 | -0.03     | 0.41   | 0.20     | -0.01    | 0.10  |
| SHSA   | -0.79*                  | –                    | -0.63*    | -2.01* | -0.38    | -0.32    | -1.12 |
|        | –                       | 0.93*                | -0.67*    | -1.32  | -0.56    | -0.27    | -0.93 |
| SEAS   | -2.03*                  | –                    | 0.37      | 1.25   | 0.79     | 0.48     | 0.87  |
|        | –                       | 0.79*                | 0.13      | 0.53   | 0.56     | 0.24     | 0.70  |
| AUST   | -0.21                   | –                    | 0.11      | -2.43  | -0.11    | 0.23     | -0.46 |
|        | –                       | 4.46*                | 0.96      | 13.50  | 1.34     | 1.24     | 4.15  |
| BOAS   | 3.14*                   | –                    | 0.46      | 0.60   | 1.69*    | 0.92     | 1.16* |
|        | –                       | 8.52*                | -0.26     | -1.22  | 1.84*    | 1.18*    | 0.38  |
| CEAS   | 0.11                    | –                    | 1.85*     | 6.68*  | 3.72     | 1.45     | 3.24* |
|        | –                       | 0.74                 | 0.30      | 0.24   | -0.11    | -0.09    | 0.64  |
| CEAM   | -0.08                   | –                    | -0.63     | 0.45   | 0.55     | 0.15     | 0.36  |
|        | –                       | 0.90*                | -0.20     | 0.15   | 0.18     | 0.12     | -0.21 |
| NHSA   | 0.45                    | –                    | 0.85      | 1.90   | 1.75     | 0.68     | 1.97  |
|        | –                       | 1.53*                | 0.70      | 1.09   | 0.89     | 0.45     | 0.93  |
| TENA   | 1.16                    | –                    | 0.96      | 1.29   | 0.58     | 0.99     | 1.23  |
|        | –                       | 3.42*                | 0.63      | -0.03  | 0.84     | 0.48     | 0.07  |
| MIDE   | -0.85                   | –                    | -0.20     | -1.34  | 1.94     | 0.22     | -0.30 |
|        | –                       | 1.72                 | 0.41      | -0.59  | 1.98     | 0.61     | -0.57 |
| EQAS   | -1.11                   | –                    | 1.05*     | 3.34*  | 0.94     | -0.01    | 2.57* |
|        | –                       | -0.40                | 0.41      | 0.86   | -0.67    | 0.97     | -0.19 |
| BONA   | 2.94*                   | –                    | 0.69      | 1.14   | 0.23     | 0.21     | 0.88  |
|        | –                       | -0.55                | 1.01      | 1.41   | -0.42    | -0.39    | 2.46* |
| EURO   | 0.96                    | –                    | -0.61     | 0.28   | 2.26     | -0.31    | 2.49  |
|        | –                       | 2.22                 | -0.32     | 0.21   | 2.64     | 0.19     | 1.20  |

**Table S3.** Simulated fire combustion rate regional trends under diagnostic BA ( % year<sup>-1</sup>), with \* denoting significance at the 95% level. Values are shown as 2001–2016 (top) and 2002–2020 (bottom), since the augmented “natural” GFED4.1s and GFED5 data spans 2001–2016 and 2002–2020, receptively.

| Region | GCB Inversions <sub>adj</sub> | Prognostic BA | Diagnostic BA | Prog. – Diag. | Bias Reduction |
|--------|-------------------------------|---------------|---------------|---------------|----------------|
| GLOBAL | 2.62 ± 0.62                   | 3.23 ± 1.28   | 2.88 ± 1.13   | 0.35          | 0.35           |
| NHAF   | 0.04 ± 0.30                   | 0.27 ± 0.14   | 0.25 ± 0.13   | 0.02          | 0.02           |
| SHAF   | 0.08 ± 0.20                   | 0.33 ± 0.15   | 0.22 ± 0.13   | 0.11          | 0.11           |
| SHSA   | 0.28 ± 0.48                   | 0.46 ± 0.46   | 0.37 ± 0.42   | 0.09          | 0.09           |
| SEAS   | 0.31 ± 0.38                   | 0.22 ± 0.12   | 0.20 ± 0.09   | 0.02          | -0.02          |
| AUST   | 0.07 ± 0.17                   | 0.04 ± 0.13   | 0.01 ± 0.12   | 0.03          | -0.03          |
| BOAS   | 0.56 ± 0.27                   | 0.42 ± 0.14   | 0.38 ± 0.17   | 0.04          | -0.04          |
| CEAS   | 0.45 ± 0.47                   | 0.31 ± 0.17   | 0.31 ± 0.15   | 0.00          | 0.00           |
| CEAM   | 0.02 ± 0.12                   | 0.11 ± 0.08   | 0.10 ± 0.06   | 0.01          | 0.01           |
| NHSA   | -0.02 ± 0.10                  | 0.18 ± 0.15   | 0.16 ± 0.14   | 0.02          | 0.02           |
| TENA   | 0.29 ± 0.31                   | 0.20 ± 0.19   | 0.19 ± 0.19   | 0.01          | -0.01          |
| MIDE   | -0.03 ± 0.10                  | 0.04 ± 0.04   | 0.05 ± 0.05   | -0.01         | -0.01          |
| EQAS   | 0.25 ± 0.15                   | 0.20 ± 0.10   | 0.19 ± 0.10   | 0.01          | -0.01          |
| BONA   | 0.37 ± 0.15                   | 0.26 ± 0.08   | 0.27 ± 0.08   | -0.01         | 0.01           |
| EURO   | 0.04 ± 0.16                   | 0.16 ± 0.11   | 0.17 ± 0.11   | -0.01         | -0.01          |

**Table S4.** Mean natural land sink (NBP) in the land-use emission and river flux adjusted GCB inversions and multi-model averages in the prognostic and diagnostic BA simulations, with inter-model spread (S.D) shown. The final columns show the difference in the multi-model mean (Prognostic BA minus Diagnostic BA), and the reduction in absolute bias relative to the adjusted GCB inversion means when diagnostic BA is used over prognostic.

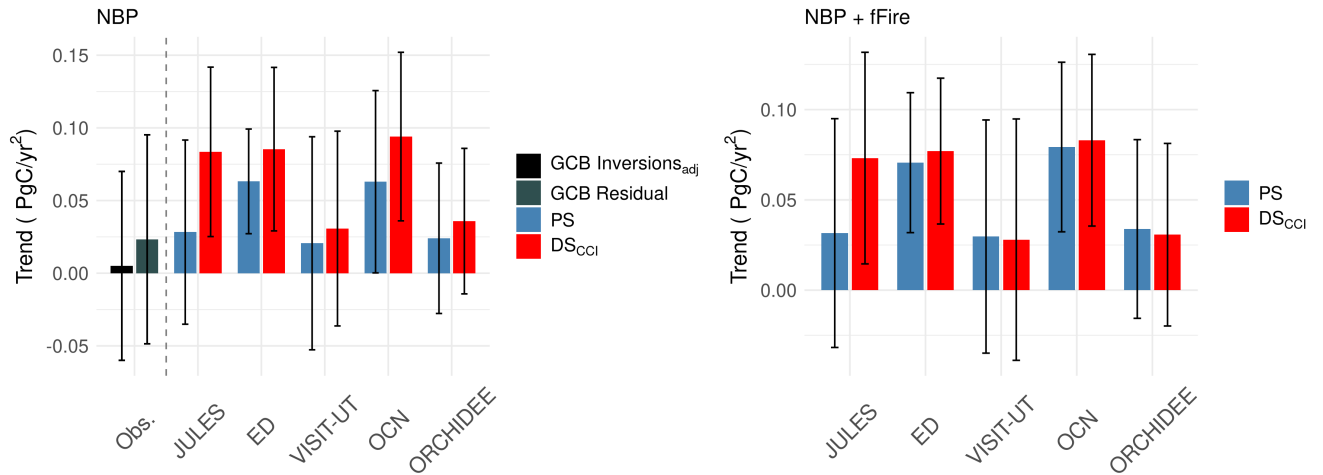

**Figure S2.** Bar plots of the linear trends in NBP and NBP plus fire emissions across all models over 2001–2020, with whiskers showing and 95% confidence intervals. In panel a, trends in the GCB residual and GCB inversion datasets (adjusted for land-use change emissions and the river flux) are also shown.

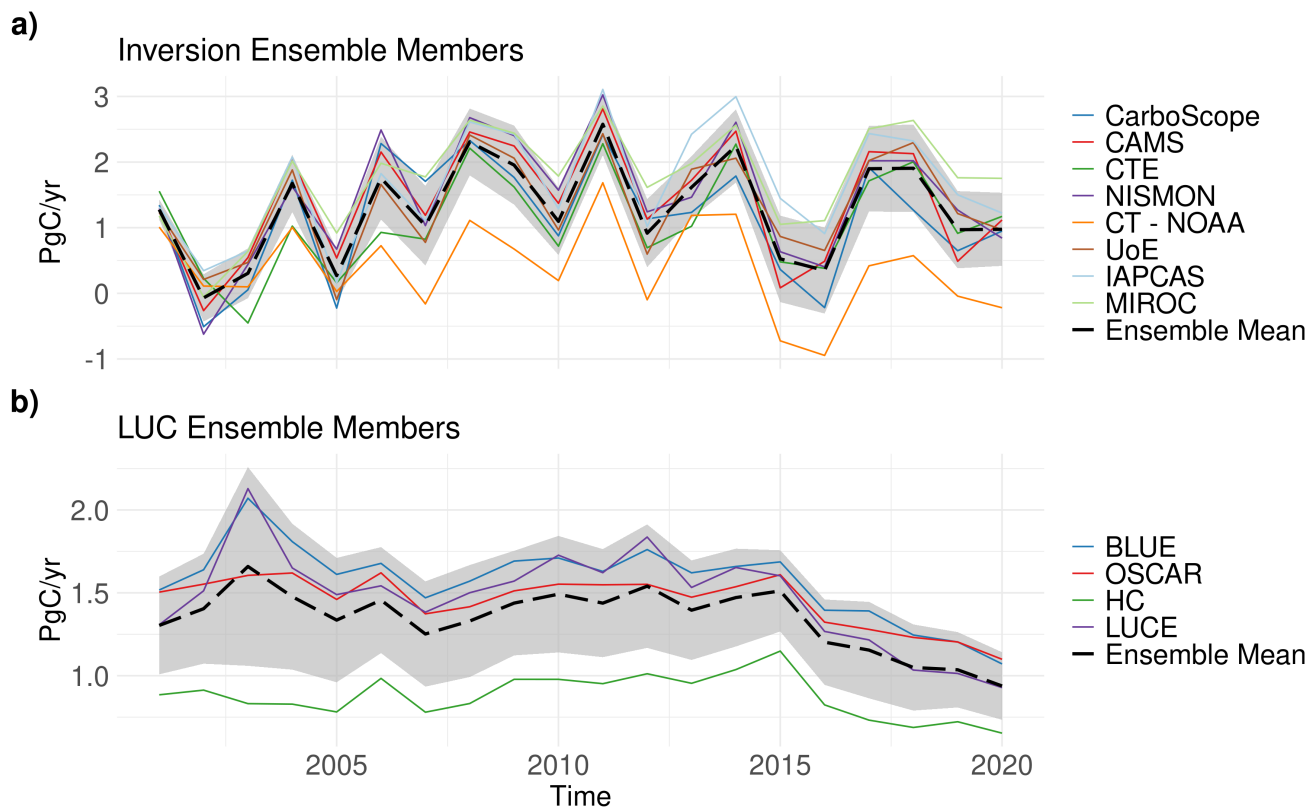

**Figure S3.** Atmospheric inversion estimates used in GCB over 2001–2020 adjusted for the lateral river flux ( $n = 8$ , panel a) and land-use change emission estimates ( $n = 4$ , panel b) from each model used in the GCB ensembles, further described in Section ???. Ensemble means are added in black (dashed) and shaded area show area enclosed by 1 inter-model S.D about the mean.

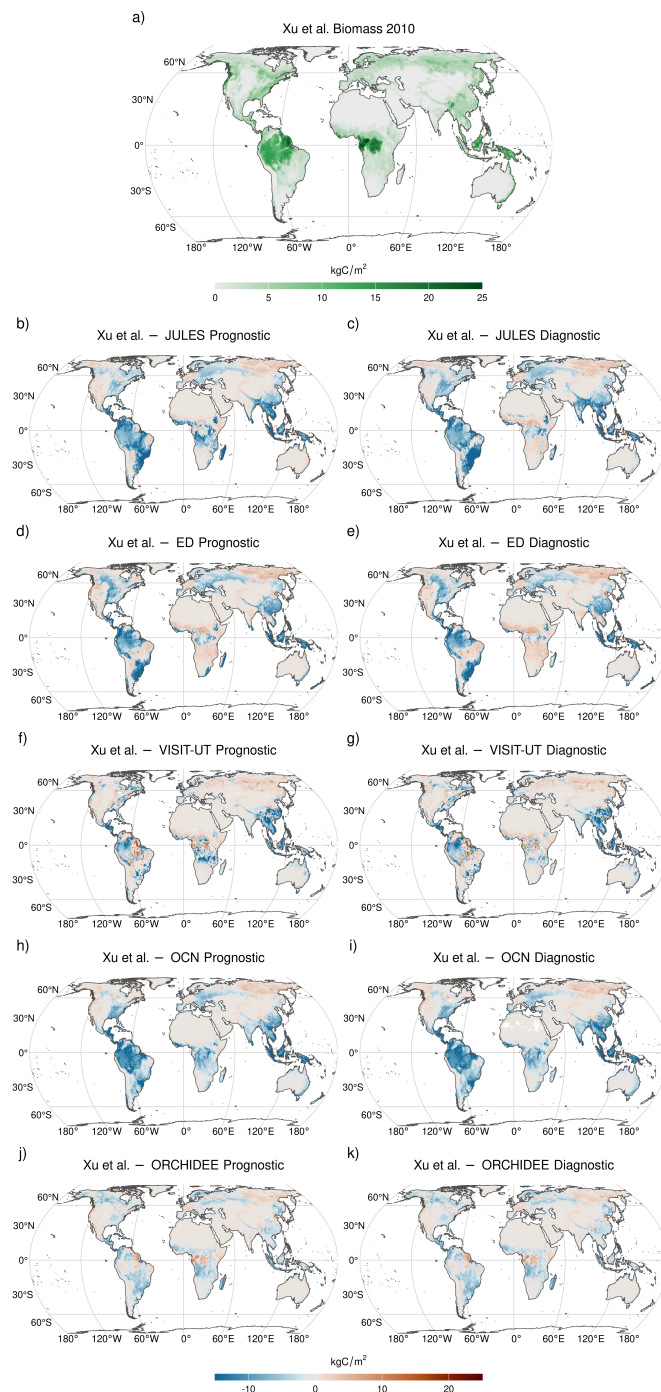

**Figure S4.** Spatial plots of the difference between biomass carbon estimates from each participating model and the ? biomass product globally in 2010.
